# Supplementary material for: Identification of Extracellular Actin As a Ligand for Triggering Receptor Expressed on Myeloid Cells-1 Signaling
Source: PubMed Central journal article supplement (PMC5545922; doi:10.3389/fimmu.2017.00917), 2017-08-07

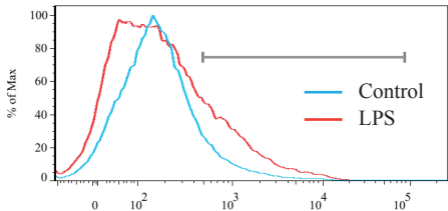

surface actin distribution

Control

LPS

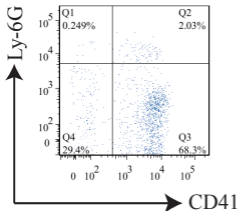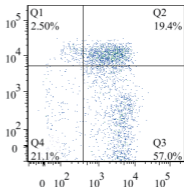

Supplement: image_1.pdf [file image_1.pdf]
