# Supplementary material for: Identification of Extracellular Actin As a Ligand for Triggering Receptor Expressed on Myeloid Cells-1 Signaling
Source: PubMed Central journal article supplement (PMC5545922; doi:10.3389/fimmu.2017.00917), 2017-08-07

A

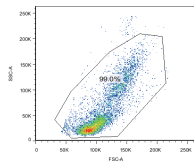

B

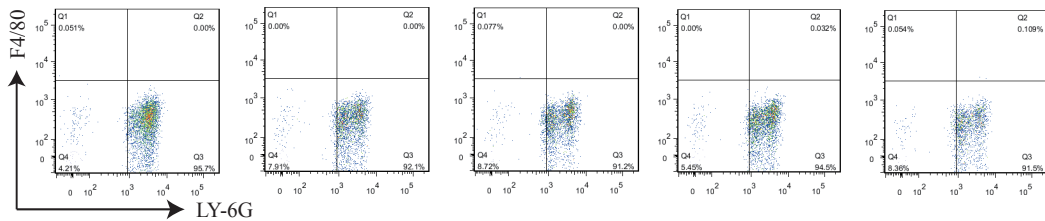

C

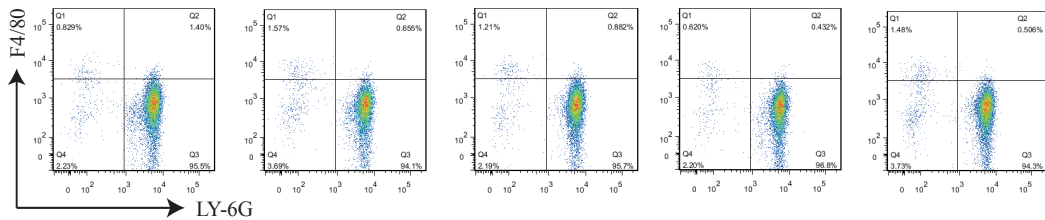

Supplement: image_3.pdf [file image_3.pdf]
